# Supplementary material
Source: PubMed Central journal article supplement (PMC2705559)
Supplement: 0812254106_0812254106SI.pdf [file 0812254106_0812254106SI.pdf]

# Supporting Information

Stoyanova et al. 10.1073/pnas.0812254106

| HeLa pSuper | No Treatment | Cisplatin    | Aclarubicin  | UV           |
|-------------|--------------|--------------|--------------|--------------|
| G1          | 36.4 +/- 1.8 | 49.9 +/- 0.6 | 30.9 +/- 2.8 | 19.1 +/- 0.6 |
| S           | 26.4 +/- 2.6 | 13.6 +/- 1.0 | 14.0 +/- 1.6 | 28.1 +/- 1.2 |
| G2          | 21.9 +/- 1.3 | 9.3 +/- 1.0  | 9.2 +/- 1.2  | 26.2 +/- 2.1 |
| Sub-G1      | 7.9 +/- 0.8  | 22.7 +/- 0.5 | 42.1 +/- 1.3 | 21.8 +/- 2.8 |
| Poly        | 7.1 +/- 0.5  | 4.2 +/- 1.8  | 3.6 +/- 0.4  | 4.5 +/- 1.0  |
| HeLa shDDB2 | No Treatment | Cisplatin    | Aclarubicin  | UV           |
| G1          | 65.7 +/- 0.8 | 35.9 +/- 1.8 | 44.1 +/- 3.6 | 24.5 +/- 1.3 |
| S           | 11.9 +/- 0.4 | 46.3 +/- 1.1 | 22.6 +/- 2.5 | 44.2 +/- 2.5 |
| G2          | 13.7 +/- 0.2 | 11.9 +/- 0.9 | 11.4 +/- 0.9 | 17.2 +/- 1.1 |
| Sub-G1      | 5.0 +/- 0.9  | 4.3 +/- 0.9  | 16.3 +/- 2.3 | 8.3 +/- 1.6  |
| Poly        | 3.5 +/- 0.3  | 6.5 +/- 2.0  | 5.3 +/- 0.2  | 5.4 +/- 0.5  |

Fig. S1. Flow-cytometric analyses of HeLa cells expressing DDB2-shRNA after treatments with different DNA-damaging agents. The average distribution from three samples is shown.



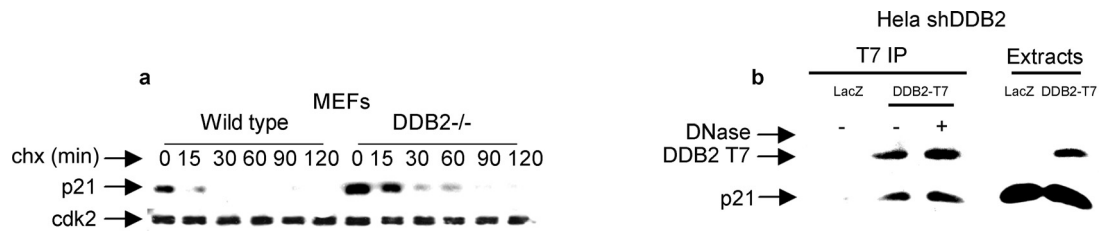

**Fig. S3.** (a) Wild-type MEFs or DDB2<sup>-/-</sup> MEFs were treated with cycloheximide for the indicated time periods. Cells were harvested and the extracts were subjected to Western blot analysis for the levels of p21. (b) HeLa cells expressing shRNA against DDB2 were infected with adenovirus expressing T7-tagged DDB2 or Lac Z. Extracts of the infected cells were treated with or without DNase (5 units) in the presence of 10 mM MgCl<sub>2</sub> for 20 minutes at RT. The extracts were then subjected to immunoprecipitation with T7-antibody followed by Western blot for p21.



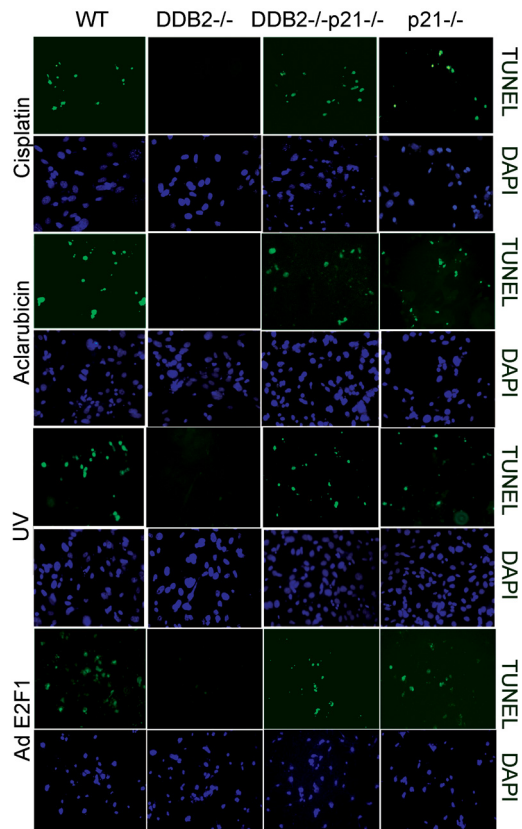

**Fig. S5.** WT, DDB2<sup>-/-</sup>, DDB2<sup>-/-</sup>p21<sup>-/-</sup> or p21<sup>-/-</sup> MEFs were treated with cisplatin, aclarubicin, UV or infected with adenovirus expressing E2F1. Twenty-four hours after treatment or infection cells were subjected to TUNEL assay to measure apoptosis.
